# Supplementary material
Source: PubMed Central journal article supplement (PMC9529194)
Supplement: ASN.2022020135SupplementaryData1.pdf [file ASN.2022020135SupplementaryData1.pdf]

## Supplemental Materials

|                                                                                                                                                                                                                                       |           |
|---------------------------------------------------------------------------------------------------------------------------------------------------------------------------------------------------------------------------------------|-----------|
| <b>Supplemental Table 1. Specification and emulation of a target trial of rosuvastatin therapy (vs. atorvastatin therapy) and risk of hematuria and proteinuria using observational data .....</b>                                    | <b>2</b>  |
| <b>Supplemental Table 2. Codes for comorbidities, negative control outcome, and kidney failure with replacement therapy .....</b>                                                                                                     | <b>3</b>  |
| <b>Supplemental Table 3. Inverse-probability-of-treatment weighted urine testing rates .....</b>                                                                                                                                      | <b>4</b>  |
| <b>Supplemental Table 4. Comparison of patient characteristics between those included and excluded due to missing data.....</b>                                                                                                       | <b>5</b>  |
| <b>Supplemental Table 5. Results in the users of rosuvastatin or atorvastatin with at least two prescriptions .....</b>                                                                                                               | <b>6</b>  |
| <b>Supplemental Table 6. As treated analysis: comparing rosuvastatin use vs. atorvastatin use, overall and across eGFR levels .....</b>                                                                                               | <b>7</b>  |
| <b>Supplemental Table 7. Risks of atherosclerotic cardiovascular disease associated with rosuvastatin versus atorvastatin across eGFR levels .....</b>                                                                                | <b>8</b>  |
| <b>Supplemental Figure 1. Derivation of study population in 40 health care organizations (cohorts) in Optum Labs Data Warehouse.....</b>                                                                                              | <b>9</b>  |
| <b>Supplemental Figure 2. Standardized mean differences (SMD) (%) across covariates in all individual cohorts .....</b>                                                                                                               | <b>10</b> |
| <b>Supplemental Figure 3. Prescribed rosuvastatin dose by eGFR category after excluding individuals with recent heart failure or myocardial infarction or very high cholesterol value .....</b>                                       | <b>11</b> |
| <b>Supplemental Figure 4. Risks of outcomes comparing different doses of rosuvastatin among rosuvastatin users after excluding individuals with recent heart failure or myocardial infarction or very high cholesterol value.....</b> | <b>12</b> |
| <b>Supplemental Figure 5. Prescribed rosuvastatin dose by creatinine clearance category.....</b>                                                                                                                                      | <b>13</b> |

**Supplemental Table 1. Specification and emulation of a target trial of rosuvastatin therapy (vs. atorvastatin therapy) and risk of hematuria and proteinuria using observational data**

| Protocol component   | Target trial specification                                                                                                                                                                                                                                                                     | Target trial emulation                                                                                                                                                                                                                                                                         |
|----------------------|------------------------------------------------------------------------------------------------------------------------------------------------------------------------------------------------------------------------------------------------------------------------------------------------|------------------------------------------------------------------------------------------------------------------------------------------------------------------------------------------------------------------------------------------------------------------------------------------------|
| Eligibility criteria | Age ≥ 18 years, between 2011 and 2019<br>No history of hematuria, proteinuria, rhabdomyolysis, or end-stage kidney disease<br>No statin prescription within the past year<br>At least 1 year of engagement with health system<br>Baseline is defined as the initiation of treatment strategies | Same as for the target trial<br>We used diagnostic codes and lab values (if available) to define hematuria, proteinuria, or rhabdomyolysis<br>We used codes to define end-stage kidney disease<br>We also required information on lab values and body mass index measured during the past year |
| Treatment strategies | (1) Initiation of rosuvastatin<br>(2) Initiation of atorvastatin (active comparator)<br>When clinically warranted during the follow-up, patients and providers decide whether to stop or switch therapy<br>Baseline is defined as the statin initiation date (rosuvastatin or atorvastatin)    | Same as for the target trial<br>We defined the date statin initiation to be the first date of a prescription.                                                                                                                                                                                  |
| Treatment assignment | Individuals are randomly assigned to a strategy and will be aware of their assigned treatment group                                                                                                                                                                                            | We classified individuals according to the strategy that their data were compatible with at baseline and attempted to emulate randomization by inverse probability of treatment weighting                                                                                                      |
| Outcome              | Hematuria and proteinuria                                                                                                                                                                                                                                                                      | Same as for the target trial                                                                                                                                                                                                                                                                   |
| Follow-up            | Starts at baseline and ends at the first occurrence of a study outcome, end-stage kidney disease, death, end of study follow-up (transfer out of the current health system or incomplete follow-up), whichever comes first                                                                     | Same as for the target trial                                                                                                                                                                                                                                                                   |
| Causal contrasts     | Intention-to-treat effect                                                                                                                                                                                                                                                                      | Observational analog of intention-to-treat effect                                                                                                                                                                                                                                              |
| Statistical analysis | Intention-to-treat analyses<br>Subgroup analyses by eGFR                                                                                                                                                                                                                                       | Same as for the target trial                                                                                                                                                                                                                                                                   |

**Supplemental Table 2. Codes for comorbidities, negative control outcome, and kidney failure with replacement therapy**

| Comorbidities                                               | ICD-9 diagnostic codes                                                     | ICD-10 diagnostic codes                                                                                                          | ICD-9 procedure codes      | ICD-10 procedure codes       | CPT                                                                                                                                                                    | HCPSC                                                  |
|-------------------------------------------------------------|----------------------------------------------------------------------------|----------------------------------------------------------------------------------------------------------------------------------|----------------------------|------------------------------|------------------------------------------------------------------------------------------------------------------------------------------------------------------------|--------------------------------------------------------|
| Hematuria <sup>§</sup>                                      | 599.7, 599.70, 599.71, 599.72                                              | R31, R31.0, R31.1, R31.2, R31.21, R31.29, R31.9                                                                                  |                            |                              |                                                                                                                                                                        |                                                        |
| Proteinuria <sup>§</sup>                                    | 791.0                                                                      | R80, R80.0, R80.1, R80.9, R80.8, R80.9                                                                                           |                            |                              |                                                                                                                                                                        |                                                        |
| Hypothyroidism                                              | 244                                                                        | E02, E03, E89.0                                                                                                                  |                            |                              |                                                                                                                                                                        |                                                        |
| Diabetes                                                    | 250                                                                        | E10, E11, E13                                                                                                                    |                            |                              |                                                                                                                                                                        |                                                        |
| Hypertension                                                | 401-405                                                                    | I10-I16                                                                                                                          |                            |                              |                                                                                                                                                                        |                                                        |
| Coronary artery disease                                     | 410, 411.8, 414, 36.1                                                      | I21-I25, 0210-0213                                                                                                               |                            |                              |                                                                                                                                                                        |                                                        |
| Cerebrovascular disease                                     | 430-438, V12.54                                                            | I60-I69                                                                                                                          |                            |                              |                                                                                                                                                                        |                                                        |
| Heart failure                                               | 428                                                                        | I50                                                                                                                              |                            |                              |                                                                                                                                                                        |                                                        |
| Urinary tract infection                                     | 595.0, 595.2, 595.89, 595.9, 599.0, 590.10, 590.11, 590.00, 590.01, 590.80 | N30, N30.0, N30.00, N30.01, N30.2, N30.20, N30.21, N30.8, N30.80, N30.81, N30.9, N30.90, N30.91, N39.0, N10, N11.0, N11.1, N13.6 |                            |                              |                                                                                                                                                                        |                                                        |
| Kidney failure with replacement therapy (KFRT) <sup>¶</sup> | 585.5, 585.6, <u>V42.0</u> , V45.1*, V56*, <u>996.81</u>                   | N18.5, N18.6, Z48.22, Z49*, Z91.15, <u>Z94.0</u> , Z99.2, <u>T86.1*</u>                                                          | 39.95, 54.98, <u>55.69</u> | <u>0TY*</u> , 5A1D*, 3E1M39Z | 90920, 90921, 90924, 90925, 90935, 90937, 90940, 90945, 90947, 90957, 90958, 90959, 90960, 90961, 90962, 90965, 90966, 90969, 90970, 90989, 90993, 90997, 90999, 99512 | G0257, G0317, G0317, G0318, G0319, G0323, G0327, S9339 |

<sup>§</sup>ICD codes were used only to exclude individuals from the study at baseline.

Underlined codes in KFRT are codes for kidney transplant.

<sup>¶</sup>KFRT is defined as kidney transplant with procedure codes or inpatient diagnosis codes, or chronic dialysis with ICD diagnosis code of stage V CKD or ESKD when there was a CPT, HCPSC and ICD codes of dialysis within 7 days later or CPT, HCPSC and ICD codes of dialysis when there were at least three dialysis codes lasted longer than a month and any two consecutive codes were within three months.

ICD, International Classification of Diseases; CPT, current procedural terminology; HCPSC, health system common procedure coding system

**Supplemental Table 3. Inverse-probability-of-treatment weighted urine testing rates**

| Testing rates per 2-year, median (IQI) | Rosuvastatin group | Atorvastatin group |
|----------------------------------------|--------------------|--------------------|
| Hematuria, overall                     | 0.6 (0, 2.0)       | 0.6 (0, 1.9)       |
| ≥60                                    | 0.6 (0, 1.9)       | 0.6 (0, 1.8)       |
| 30-59                                  | 0.8 (0, 2.2)       | 0.8 (0, 2.3)       |
| <30                                    | 0.5 (0, 2.0)       | 0.5 (0, 2.1)       |
| Proteinuria, overall                   | 1.1 (0, 2.9)       | 1.1 (0, 2.8)       |
| ≥60                                    | 1.1 (0, 2.8)       | 1.1 (0, 2.7)       |
| 30-59                                  | 1.3 (0, 3.3)       | 1.3 (0, 3.3)       |
| <30                                    | 1.0 (0, 3.1)       | 1.0 (0, 3.3)       |

IQI: interquartile interval

**Supplemental Table 4. Comparison of patient characteristics between those included and excluded due to missing data**

|                                  | Patients included | Patients excluded | SMD (%) |
|----------------------------------|-------------------|-------------------|---------|
| No. of cohorts                   | 40                | 40                | -       |
| No. of participants              | 947,900           | 1,126,740         | -       |
| Age, mean (SD), years            | 60.1 (12.1)       | 62.1 (12.4)       | -16.30  |
| Women, No. (%)                   | 451024 (47.6)     | 529085 (47.0)     | 1.25    |
| Race/ethnicity, No. (%)          |                   |                   |         |
| Black                            | 92323 (9.7)       | 113086 (10.0)     | -0.99   |
| Hispanic                         | 37293 (3.9)       | 41914 (3.7)       | 1.12    |
| White                            | 767090 (80.9)     | 912205 (81.0)     | -0.09   |
| Other                            | 51194 (5.4)       | 59535 (5.3)       | 0.52    |
| Comorbidities, No. (%)           |                   |                   |         |
| Diabetes                         | 279648 (29.5)     | 286419 (25.4)     | 9.17    |
| Hypertension                     | 636422 (67.1)     | 659999 (58.6)     | 17.76   |
| Coronary artery disease          | 224396 (23.7)     | 349207 (31.0)     | -16.42  |
| Cerebrovascular disease          | 98602 (10.4)      | 150959 (13.4)     | -9.22   |
| Heart failure                    | 59430 (6.3)       | 89764 (8.0)       | -6.57   |
| Hypothyroidism                   | 147306 (15.5)     | 123324 (10.9)     | 13.68   |
| Concomitant medications, No. (%) |                   |                   |         |
| ACE inhibitors                   | 211275 (22.3)     | 264634 (23.5)     | -2.85   |
| ARBs                             | 100438 (10.6)     | 123801 (11.0)     | -1.26   |
| Aldosterone antagonists          | 13724 (1.4)       | 21119 (1.9)       | -3.32   |
| Other HTN meds                   | 328160 (34.6)     | 450368 (40.0)     | -11.07  |
| SGLT2 inhibitors                 | 7853 (0.8)        | 8190 (0.7)        | 1.16    |
| DPP4 inhibitors                  | 16193 (1.7)       | 21466 (1.9)       | -1.47   |
| GLP1RAs                          | 8614 (0.9)        | 10116 (0.9)       | 0.12    |
| Other oral DM meds               | 143350 (15.1)     | 150497 (13.4)     | 5.07    |
| Insulin                          | 42122 (4.4)       | 72946 (6.5)       | -8.88   |
| DOACs                            | 13366 (1.4)       | 28111 (2.5)       | -7.76   |
| Warfarin                         | 18362 (1.9)       | 31900 (2.8)       | -5.82   |
| Antiplatelets                    | 57933 (6.1)       | 137016 (12.2)     | -20.84  |
| Cyclosporine                     | 617 (0.1)         | 1860 (0.2)        | -2.90   |
| Itraconazole                     | 180 (0.0)         | 77 (0.0)          | 1.09    |
| Clarithromycin                   | 540 (0.1)         | 921 (0.1)         | -0.93   |
| Protease inhibitors              | 399 (0.0)         | 436 (0.0)         | 0.17    |
| Fibrates                         | 24479 (2.6)       | 31637 (2.8)       | -1.39   |
| Niacin                           | 4663 (0.5)        | 8775 (0.8)        | -3.58   |
| PCSK9 inhibitors                 | 159 (0.0)         | 251 (0.0)         | -0.39   |
| Ezetimibe                        | 11101 (1.2)       | 16406 (1.5)       | -2.49   |

**Supplemental Table 5. Results in the users of rosuvastatin or atorvastatin with at least two prescriptions**

|             | Unweighted no. of events/N |              | IPTW-IR (95% CI), per 1000 PYs |                | IPTW-IRD (95% CI), per 1000 PYs | IPTW-HR (95% CI)  |
|-------------|----------------------------|--------------|--------------------------------|----------------|---------------------------------|-------------------|
|             | Rosuvastatin               | Atorvastatin | Rosuvastatin                   | Atorvastatin   |                                 |                   |
| Hematuria   | 4902/144470                | 19024/685551 | 9.2 (8.9, 9.5)                 | 8.5 (8.4, 8.7) | 0.68 (0.36, 1.0)                | 1.08 (1.04, 1.12) |
| Proteinuria | 1638/144470                | 6254/685551  | 3.1 (3.0, 3.3)                 | 2.7 (2.7, 2.8) | 0.39 (0.20, 0.58)               | 1.15 (1.08, 1.22) |

Abbreviations: IPTW, inverse-probability of treatment weight; IR, incidence rate; PYs, person-years; HR, hazard ratio; CI, confidence interval; IRD, incidence rate difference

**Supplemental Table 6. As treated analysis: comparing rosuvastatin use vs. atorvastatin use, overall and across eGFR levels**

|                    | Unweighted no. of events/N |              | IPTW-IR (95% CI), per 1000 PYs |                   | IPTW-IRD (95% CI), per 1000 PYs | P-for heterogeneity* | IPTW-HR (95% CI)  | P-for heterogeneity* |
|--------------------|----------------------------|--------------|--------------------------------|-------------------|---------------------------------|----------------------|-------------------|----------------------|
|                    | Rosuvastatin               | Atorvastatin | Rosuvastatin                   | Atorvastatin      |                                 |                      |                   |                      |
| <b>Hematuria</b>   |                            |              |                                |                   |                                 |                      |                   |                      |
| Overall            | 3726/152101                | 17779/795799 | 9.6 (9.2, 9.9)                 | 8.9 (8.8, 9.1)    | 0.63 (0.25, 1.02)               |                      | 1.07 (1.03, 1.11) |                      |
| eGFR               |                            |              |                                |                   |                                 | 0.32                 |                   | 0.26                 |
| ≥60                | 2970/130506                | 14229/687461 | 8.8 (8.4, 9.1)                 | 8.2 (8.1, 8.4)    | 0.52 (0.12, 0.92)               |                      | 1.06 (1.01, 1.11) |                      |
| 30-59              | 705/20427                  | 3324/102392  | 14.1 (13.0, 15.4)              | 13.1 (12.6, 13.5) | 1.08 (-0.20, 2.35)              |                      | 1.08 (0.98, 1.18) |                      |
| <30                | 51/1168                    | 226/5946     | 25.6 (18.6, 36.0)              | 19.4 (17.0, 22.2) | 6.16 (-2.50, 14.8)              |                      | 1.30 (0.92, 1.83) |                      |
| <b>Proteinuria</b> |                            |              |                                |                   |                                 |                      |                   |                      |
| Overall            | 1234/152101                | 5794/795799  | 3.3 (3.1, 3.5)                 | 2.8 (2.8, 2.9)    | 0.41 (0.18, 0.64)               |                      | 1.15 (1.07, 1.23) |                      |
| eGFR               |                            |              |                                |                   |                                 | 0.04                 |                   | 0.16                 |
| ≥60                | 789/130506                 | 3783/687461  | 2.4 (2.2, 2.6)                 | 2.1 (2.1, 2.2)    | 0.22 (0.0047, 0.43)             |                      | 1.10 (1.01, 1.21) |                      |
| 30-59              | 394/20427                  | 1758/102392  | 8.3 (7.4, 9.3)                 | 6.8 (6.4, 7.1)    | 1.5 (0.50, 2.5)                 |                      | 1.23 (1.09, 1.39) |                      |
| <30                | 51/1168                    | 253/5946     | 25.5 (18.4, 36.4)              | 21.7 (19.1, 24.6) | 3.9 (-5.1, 12.8)                |                      | 1.18 (0.83, 1.68) |                      |

IPTW-HRs were from stratified Cox proportional hazards regression models by cohort

\*P-for heterogeneity in IRD across eGFR subgroups was estimated using fixed effects meta-analysis and P-for heterogeneity in HR was estimated using stratified Cox models with interaction term between rosuvastatin use and eGFR category.

Abbreviations: eGFR, estimated glomerular filtration rate; IPTW, inverse-probability of treatment weight; IR, incidence rate; PYs, person-years; HR, hazard ratio; CI, confidence interval; IRD, incidence rate difference

**Supplemental Table 7. Risks of atherosclerotic cardiovascular disease associated with rosuvastatin versus atorvastatin across eGFR levels**

|                                  | Unweighted no. of events/N |                | IPTW-IR (95% CI), per 1000 PYs |                   | IPTW-HR (95% CI), rosuvastatin vs. atorvastatin | p for heterogeneity |
|----------------------------------|----------------------------|----------------|--------------------------------|-------------------|-------------------------------------------------|---------------------|
|                                  | Rosuvastatin               | Atorvastatin   | Rosuvastatin                   | Atorvastatin      |                                                 |                     |
| Overall                          | 2,151/105,508              | 12,100/56,1957 | 6.0 (5.6, 6.3)                 | 5.9 (5.8, 6.0)    | 1.02 (0.96, 1.08)                               | 0.24                |
| eGFR, ml/min/1.73 m <sup>2</sup> |                            |                |                                |                   |                                                 |                     |
| ≥60                              | 16,986/94,936              | 9,534/508,977  | 5.3 (5.0, 5.7)                 | 5.1 (5.0, 5.2)    | 1.05 (0.98, 1.12)                               |                     |
| 30-59                            | 418/10,155                 | 2,346/50,997   | 11.2 (10.0, 12.6)              | 12.9 (12.4, 13.5) | 0.87 (0.77, 0.99)                               |                     |
| <30                              | 37/417                     | 220/1,983      | 30.3 (21.5, 44.0)              | 36.6 (32.0, 42.1) | 0.83 (0.57, 1.22)                               |                     |



**Supplemental Figure 1. Derivation of study population in 40 health care organizations (cohorts) in Optum Labs Data Warehouse**

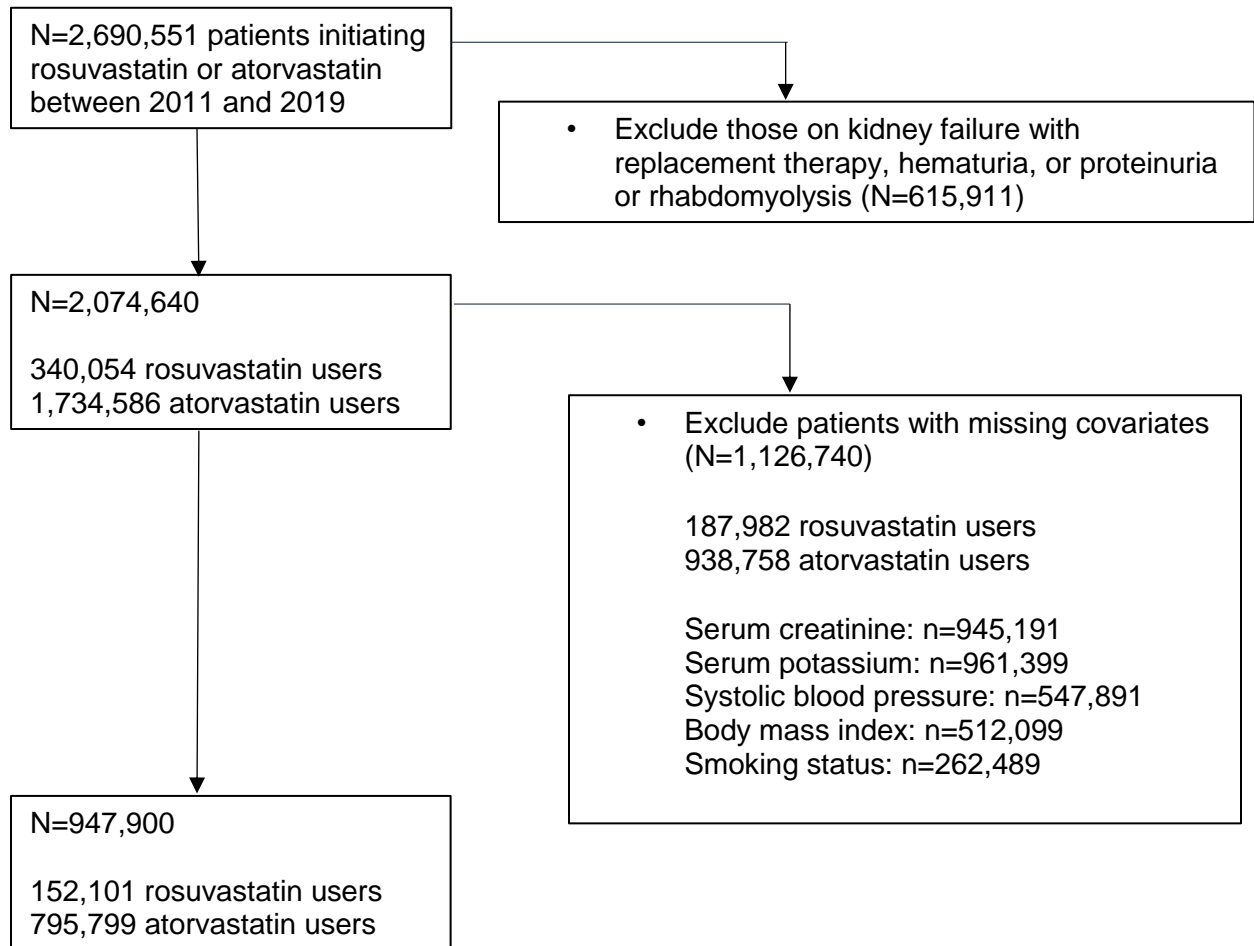

**Supplemental Figure 2. Standardized mean differences (SMD) (%) across covariates in all individual cohorts**

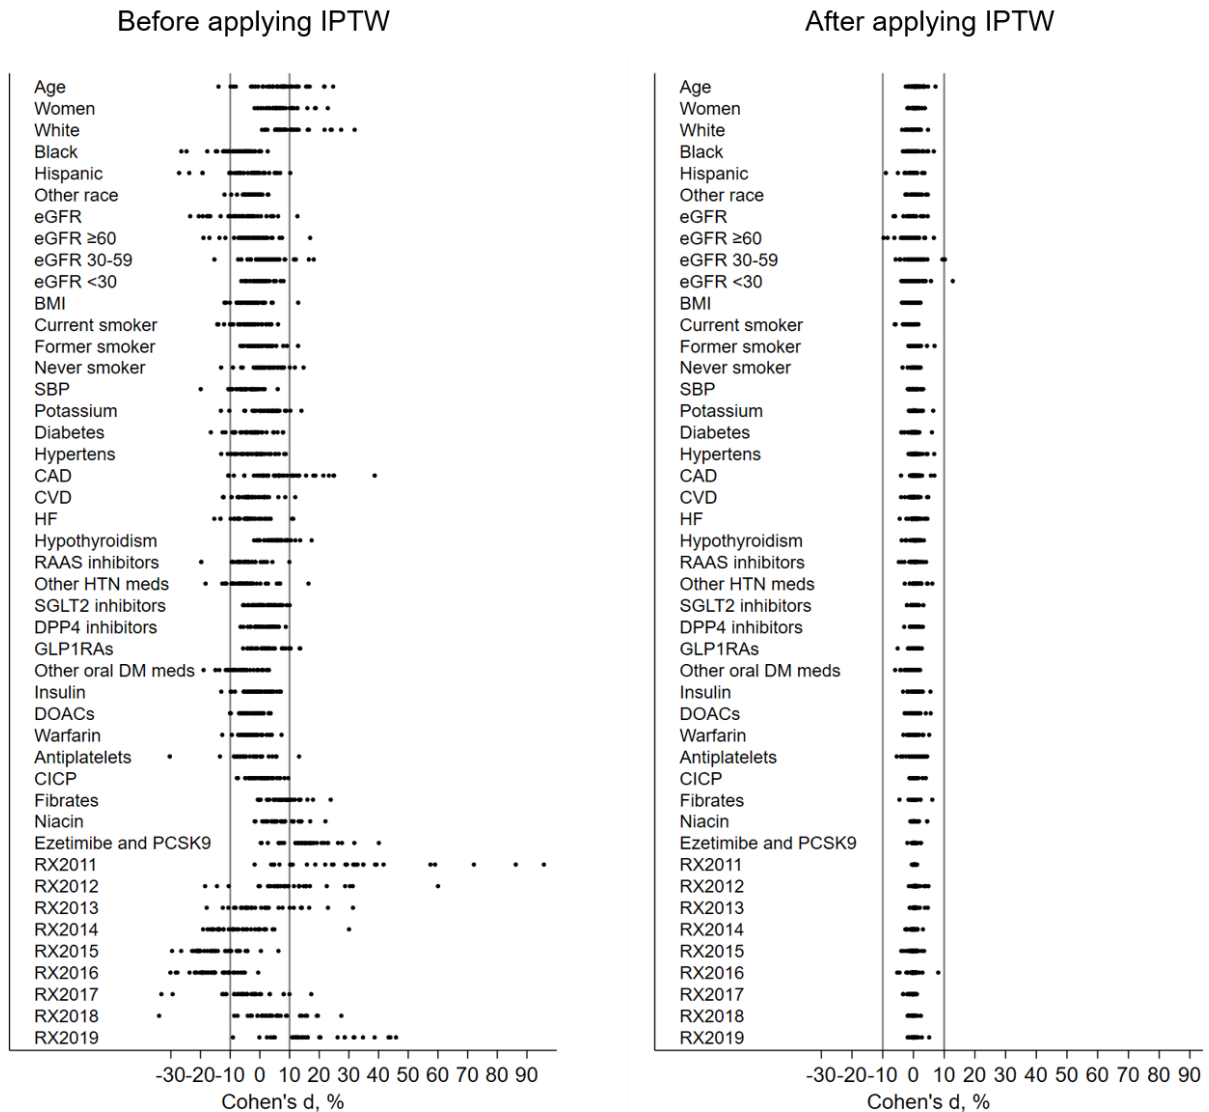

Each dot indicates an individual cohort.

Abbreviations: IPTW, inverse-probability of treatment weight; eGFR, estimated glomerular filtration rate; BMI, body mass index; SBP, systolic blood pressure; Hypertens, hypertension; CAD, coronary artery disease; CVD, cerebrovascular disease; HF, heart failure; RAAS inhibitors, renin-angiotensin-aldosterone system inhibitors (i.e., angiotensin converting enzyme (ACE) inhibitors, angiotensin II receptor blockers (ARBs), or aldosterone antagonists); HTN, hypertension; meds, medications; SGLT2 inhibitors, sodium-glucose cotransporter 2 inhibitors; DPP4 inhibitors, dipeptidyl peptidase-4 inhibitor; GLP1RAs, glucagon-like peptide-1 receptor agonists; DOACs, direct oral anticoagulants; CICP, cyclosporine, itraconazole, clarithromycin, and protease inhibitors; RX, baseline year (medication initiation year)

**Supplemental Figure 3. Prescribed rosuvastatin dose by eGFR category after excluding individuals with recent heart failure or myocardial infarction or very high cholesterol value**

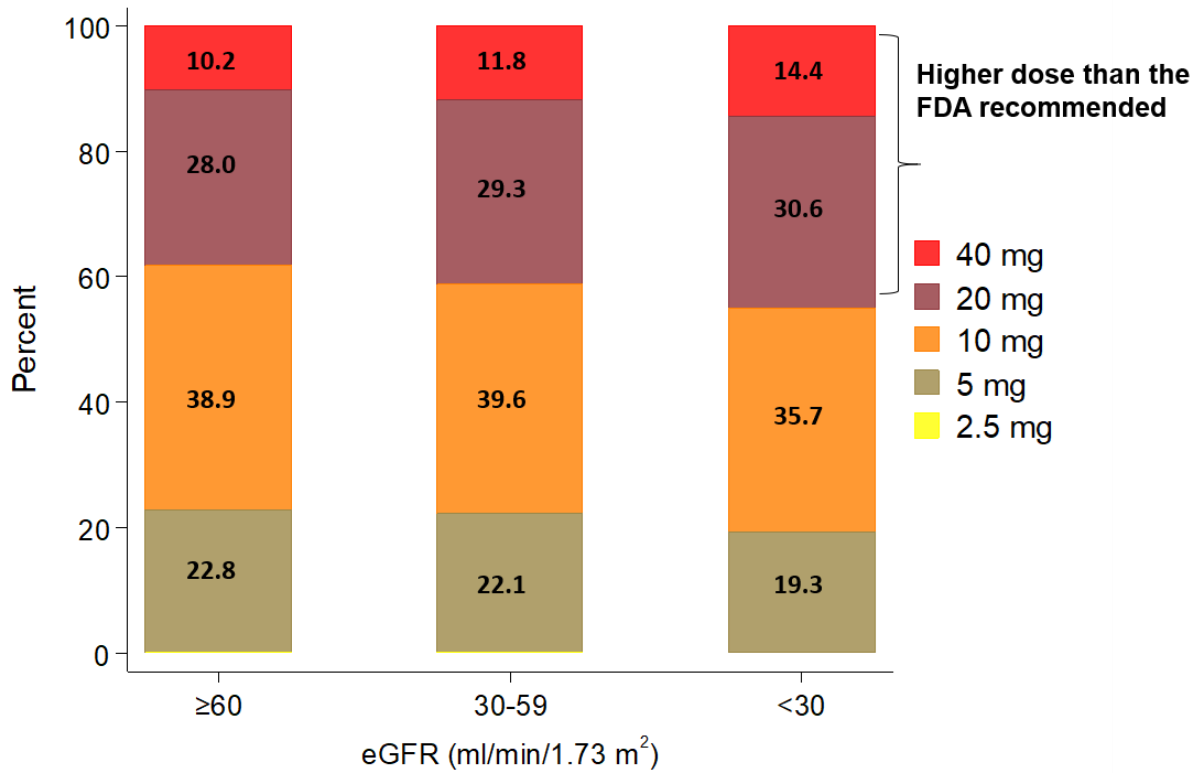

eGFR  $\geq 60$  ml/min/1.73 m<sup>2</sup>, N=115,105; eGFR 30-59 ml/min/1.73 m<sup>2</sup>, N=19,199, eGFR  $< 30$  ml/min/1.73 m<sup>2</sup>, N=1,071

Abbreviations: eGFR, estimated glomerular filtration rate, FDA, the United States Food and Drug Administration

**Supplemental Figure 4. Risks of outcomes comparing different doses of rosuvastatin among rosuvastatin users after excluding individuals with recent heart failure or myocardial infarction or very high cholesterol value**

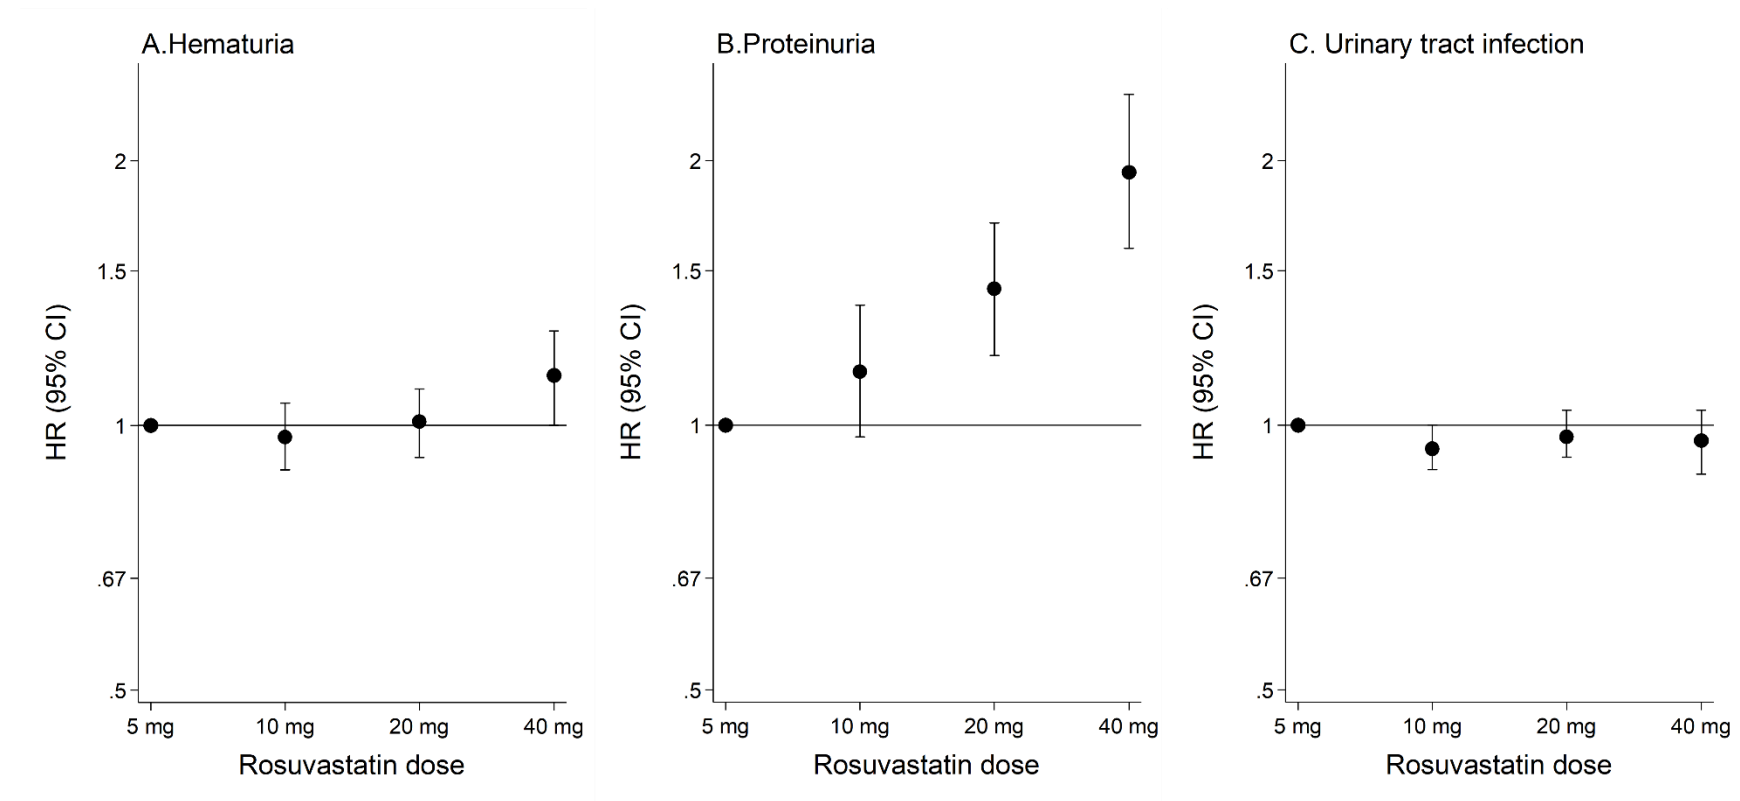

**Supplemental Figure 5. Prescribed rosuvastatin dose by creatinine clearance category**

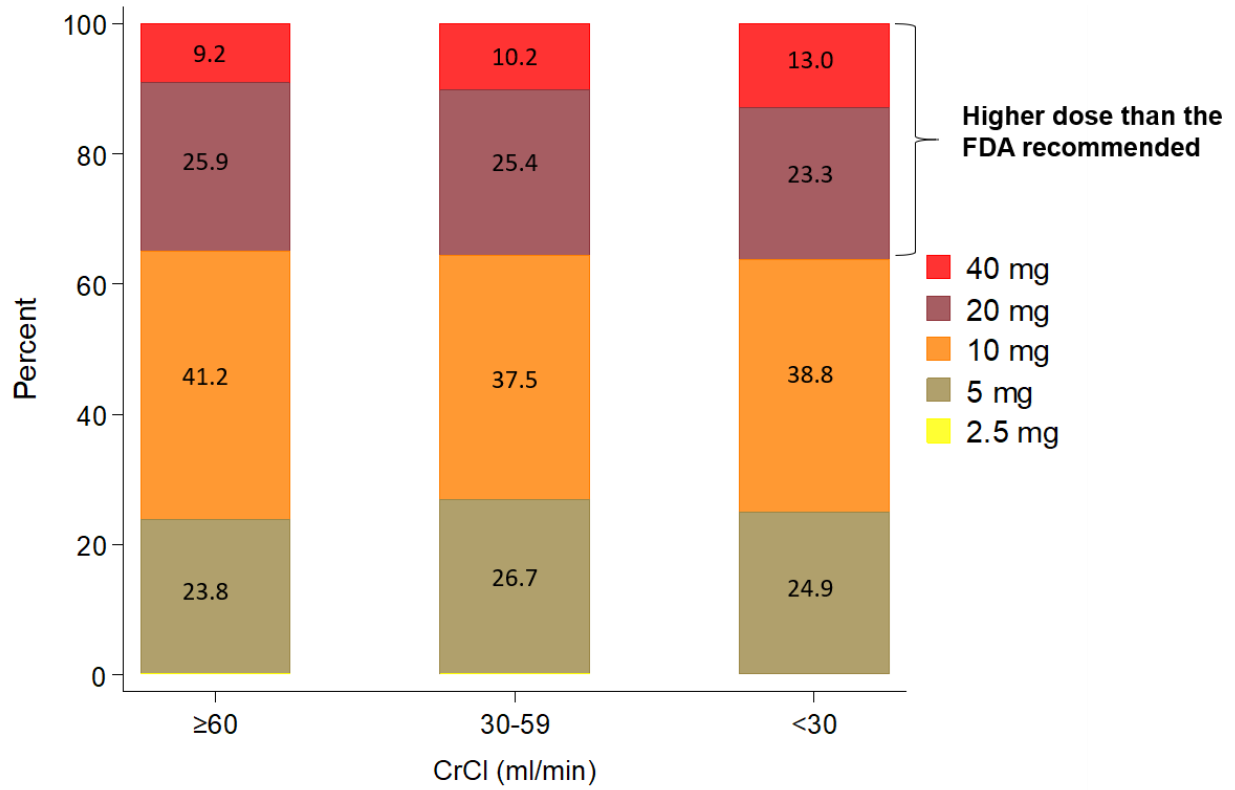

CrCl ≥60 ml/min, N= 100,415; CrCl 30-59 ml/min, N=11,938, CrCl <30 ml/min, N=810

Abbreviations: CrCl, creatinine clearance, FDA, the United States Food and Drug Administration
